Running Head: LOW POLYGENIC SCORES AND ADHD

The Positive End of the Polygenic Score Distribution for ADHD: A Risk, Protective or  
Resilience Factor?

James J. Li, Ph.D.

Waisman Center and University of Wisconsin-Madison

Correspondence

James J. Li, Ph.D., Department of Psychology, 1202 W. Johnson Street, Madison, WI 53706.

Tel: (608) 265-1091, Email: [james.li@wisc.edu](mailto:james.li@wisc.edu).

Acknowledgments

This study was supported in part by a core grant to the Waisman Center from the *Eunice Kennedy Shriver* National Institute of Child Health and Human Development (U54 HD090256).

This research uses data from Add Health, a program project directed by Kathleen Mullan Harris and designed by J. Richard Udry, Peter S. Bearman, and Kathleen Mullan Harris at the University of North Carolina at Chapel Hill and funded by grant P01-HD31921 from the Eunice Kennedy Shriver National Institute of Child Health and Human Development, with cooperative funding from 23 other federal agencies and foundations. Special acknowledgment is due Ronald R. Rindfuss and Barbara Entwisle for assistance in the original design. Information on how to

## LOW POLYGENIC SCORES AND ADHD 2

obtain the Add Health data files is available on the Add Health website

(<http://www.cpc.unc.edu/addhealth>). No direct support was received from grant P01-HD31921

for this analysis.

Manuscript word count: 2977

### **Key Points**

**Question:** Does having a low polygenic score (PGS) for ADHD reduce one's risk for ADHD relative to the incidence rate in the population; are individuals with low PGS more resilient to childhood maltreatment?

**Findings:** In this longitudinal study of 7,190 adolescents followed into adulthood, individuals with low PGS had a two-fold risk reduction for ADHD (4.1%) relative to the observed incidence of ADHD (8.3%) and showed superior functional outcomes relative to those with medium and high PGS. No evidence of resilience was detected.

**Meaning:** Low PGS may be a protective factor in not only the genesis of ADHD, but also for negative functional outcomes in adulthood.

## Abstract

**Importance:** Polygenic scores (PGS) are widely used to characterize genetic liability for heritable mental disorders, including attention-deficit/hyperactivity disorder (ADHD). However, little is known about the effects of having a low burden of genetic liability for ADHD, including whether this functions as a protective or resilience factor for psychopathology and functional outcomes in later life. Understanding the consequences of being on the “positive” side of the PGS distribution may shed light on mechanisms of risk *and* resilience for ADHD.

**Objective:** To examine the association of low PGS for ADHD and functional outcomes in adulthood. To also examine whether these associations are moderated by early childhood maltreatment.

**Design:** Wave IV of the National Longitudinal Study of Adolescent to Adult Health (Add Health), conducted between 2007 and 2008. Data analyses were conducted from March 2019 to April 2019.

**Setting:** Population-based sample in the United States.

**Participants:** Add Health adults aged 24 to 32 for whom genotypic and phenotypic data were available ( $n=7,190$ ).

**Exposure:** PGS for ADHD were used to examine associations for ADHD and across a range of functional outcomes in adulthood.

**Main Outcome and Measures:** Regression models tested the association of ADHD PGS and adult functional outcomes, including cognition, educational attainment, mental health (e.g., depression) and physical health (e.g., body mass index). Interactions between ADHD PGS and childhood maltreatment were examined for each outcome variable.

**Results:** Individuals at the lowest end of the ADHD PGS distribution exhibited a two-fold risk reduction (95% CI=2.8-5.3%) of ADHD relative to the observed prevalence in Add Health (8.3%). Individuals with low ADHD PGS (<20<sup>th</sup> percentile) demonstrated consistently superior adult functional outcomes relative to majority of individuals along the ADHD PGS distribution, including those who were in the medium and high ADHD PGS groups. No interactions between ADHD PGS and childhood maltreatment emerged.

**Conclusions and Relevance:** Low ADHD PGS may be a robust protective factor in not only the genesis of ADHD, but also of negative functional outcomes that are typically disrupted among adults with ADHD. There was no evidence that low PGS confers resilience to childhood maltreatment, however. Psychiatric PGS may hold crucial information for the purposes of clinical prediction, beyond simply risk and the absence of risk.

## The Positive End of the Polygenic Score Distribution for ADHD: A Risk, Protective or Resilience Factor?

Attention-deficit/hyperactivity disorder (ADHD) is a neurodevelopmental disorder with an estimated worldwide prevalence of 7.2%.<sup>1</sup> It is associated with a range of negative functional outcomes in adulthood, including poor cognitive functioning,<sup>2</sup> low educational attainment,<sup>3</sup> depression and substance misuse<sup>4,5</sup> involvement in the criminal justice system,<sup>6</sup> greater perceived stress<sup>7</sup> and poor physical health.<sup>3,8</sup> ADHD has a highly heritable<sup>9–12</sup> polygenic architecture.<sup>13</sup> As such, studies are increasingly using polygenic scores (PGS)<sup>14</sup> to characterize the aggregate genetic liability for ADHD, which have reliably shown that high PGS is associated with greater risk for ADHD and related negative outcomes.<sup>9,15–19</sup> Yet, little is known about the consequences of having a very low burden of genetic liability for ADHD.<sup>20,21</sup> While low ADHD PGS is expected to convey a reduction in risk for ADHD relative to individuals with higher PGS, does low PGS also convey a reduction in risk for ADHD relative to the general prevalence rate in a given population (i.e., as a protective factor)? Furthermore, are individuals with low PGS more resilient to environmental adversity? Answers to these questions have potentially important implications towards uncovering the mechanisms of risk *and* resilience for ADHD.<sup>20</sup>

PGS are computed as the linear composite of single nucleotide polymorphisms (SNPs) weighted according to genome-wide association study (GWAS) summary statistics.<sup>22</sup> Psychiatric PGS are distributed normally in population-based samples,<sup>21</sup> reflecting the continuum of genetic risk for psychopathology in a population.<sup>20</sup> Whereas individuals on the right-tail (e.g., >20<sup>th</sup> percentile) are often characterized as “high risk,”<sup>23,24</sup> individuals at the left-tail (e.g., <20<sup>th</sup> percentile) are traditionally considered a “low risk” group.<sup>23</sup> However, the term “low risk” for this subgroup is ambiguous, given that studies examining the consequences of low

psychiatric PGS are exceedingly rare. Krapohl and colleagues (2015)<sup>21</sup> showed that individuals in the lowest septile PGS for educational attainment had greatest amount of parent-reported behavior problems relative to individuals in the highest PGS septile, who had the fewest behavior problems. However, no associations were detected between low (or high) psychiatric PGS, including for ADHD, with various behavioral and socioemotional outcomes. Notably, this study was limited by the severely underpowered GWAS for psychiatric outcomes relative to the educational attainment GWAS. Given that a significantly higher-powered GWAS is now available for ADHD, a re-examination of this association is warranted.

Another open question<sup>20,21</sup> is whether low psychiatric PGS may confer *resilience* to environmental adversity. For example, childhood maltreatment (i.e., physical and sexual abuse, neglect) is an established risk factor for negative physical, mental and cognitive health outcomes in later life.<sup>25</sup> In a sample 1,985 depressed patients and controls from the Netherlands, the odds of having a major depressive disorder (MDD) was highest among those who had the highest MDD PGS and experienced severe childhood maltreatment (relative to individuals experiencing moderate or no/low maltreatment).<sup>26</sup> However, individuals at the lowest end of the MDD PGS distribution showed low odds of MDD regardless of maltreatment severity.<sup>26</sup> It should be noted that this finding was inconsistent with findings from a similar study featuring depressed patients and controls (N=2,669) from the United Kingdom.<sup>27</sup> Thus, it remains unclear whether low psychiatric PGS is a resilience or a risk factor in the face of environmental adversity.

Despite the rapid adoption of PGS in genetic association studies, most studies and recent reviews of this emerging literature<sup>22,28</sup> have ignored the functional implications of having low psychiatric PGS. This study used data from a population-based dataset to rigorously investigate the association of the ADHD PGS distribution as it pertains to ADHD and functional outcomes

that are known to be related to ADHD, including educational attainment, cognition, mental and physical health. Furthermore, this study examined whether associations between ADHD PGS and functional outcomes were moderated by childhood maltreatment. First, individuals with low ADHD PGS were expected to have a reduced risk of ADHD, relative to observed population incidence rate. Second, individuals with low ADHD PGS were expected to have superior functional outcomes in adulthood relative to those with medium and high ADHD PGS. Finally, ADHD PGS was expected to interact with childhood maltreatment, such that individuals with low ADHD PGS will more resilient to adversity relative to individuals with high ADHD PGS.

## Methods

### Participants

Data were from the National Longitudinal Study of Adolescent to Adult Health (Add Health), a stratified sample of adolescents in grades 7-12 from high schools across the U.S. Data were collected from adolescents, parents, fellow students, school administrators, siblings, friends and romantic partners across four waves: Wave I (1994-1995, grades 7-12,  $N=20,745$ ), Wave II (1995-1996, grades 8-12,  $N=14,738$ ), Wave III (2001-2002, ages 18-26,  $N=15,197$ ), and Wave IV (2007-2008, ages 24-32,  $N=15,701$ ). Wave IV phenotypic data were used given the focus on adult outcomes as a function of childhood ADHD. The current analyses were performed for individuals where both genotypic and phenotypic information were available ( $N=7,190$ ). Within the genotypic subsample, the mean age at Wave IV was 29.03 ( $s.d.=1.75$ ), 46% of this sample was male, and the racial-ethnic composition was 69.5% Caucasian (including Hispanic), 21.2% African American, .4% Native American, 5.2% Asian, and 3.7% “Other.” Demographic information comparing the genetic subsample with the non-genetic subsample is available on the Online Supplement (eTable 1).



## Measures

*ADHD.* Childhood ADHD symptoms were assessed retrospectively using 17 of the 18 items for ADHD, keyed to the *Diagnostic and Statistical Manual of Mental Disorders*.<sup>29</sup> Items were rated on a 4-point Likert scale regarding how often the symptom “best describes your behavior when you were [between 5 and 12].” Each item was dichotomized to indicate the presence (i.e., *often* or *very often* response) or absence (i.e., *never* or *sometimes* response) of the symptom. In line with the DSM, diagnostic criteria for ADHD was defined as having 6 or more symptoms of inattention and/or 6 or more symptoms of hyperactivity/impulsivity.

*Cognitive Ability.* Cognitive ability was assessed via the Add Health Picture Vocabulary Test (AHPVT) at Wave I. The task measures receptive vocabulary, verbal ability and scholastic aptitude. For this test, the interviewer read a word aloud and the participant selected an illustration that best fit its meaning. Each word had four simple, black-and-white illustrations arranged in a multiple-choice format. The standardized score for AHPVT was used.

*Educational Attainment.* Educational Attainment was assessed at Wave IV through the following question: “What is the highest level of education that you have achieved to date?” The scale ranged from 1 (“8<sup>th</sup> grade or less”) to 10 (“some graduate training beyond a master’s degree”).

*Mental Health and Behavior.* All mental health and behavior outcomes were assessed at Wave IV. Depression symptoms were measured using an abbreviated version of the Center for Epidemiologic Studies Depression Scale (CES-D<sup>30</sup>). Lifetime DSM-IV criteria for abuse or dependence for alcohol was assessed as the presence of at least 1 of the 4 items pertaining to alcohol abuse, and/or three of the 7 items pertaining to alcohol dependence occurring together in a 12-month period. Lifetime DSM-IV criteria for “other drug” abuse and dependence were

assessed using the same criteria, but for illicit substances. Ever arrested was measured by whether the participant responded affirmatively to the question: “have you ever been arrested” and/or whether the Wave IV interview was being conducted in prison. Perceived stress was measured via an abbreviated 4-item version of the Cohen’s Perceived Stress Scale,<sup>31</sup> which assessed perception of stress across various life contexts. Items were rated on a 5-point Likert scale, where 0=“never” and 4=“very often.”

*Physical Health.* All physical health outcomes were assessed at Wave IV. BMI classification was measured on a 1-6 scale, where 1=underweight (BMI<18.5), 3=overweight (BMI=20-30), and 6=obese III (BMI>40). Stage 2 Hypertension was present if the participant responded affirmatively to the question: “has a doctor, nurse or other health care provider ever told you that you have or had: high blood pressure or hypertension, systolic blood pressure, and diastolic blood pressure?” High blood cholesterol was present if the participant responded affirmatively to the question: “has a doctor, nurse or other health care provider ever told you that you have or had: high blood cholesterol or triglycerides or lipids?”

*Childhood Maltreatment.* Maltreatment was assessed retrospectively at Wave IV as the frequency of self-reported neglect, physical abuse, and sexual abuse prior to the age of 12. Following previous Add Health investigations,<sup>32,33</sup> if any item occurred at least once, childhood maltreatment was scored as positive.

*Genotyping and Quality Control.* Saliva were obtained from participants at Wave IV. Genotyping was done on the Omni1-Quad BeadChip and the Omni2.5-Quad BeadChip. Add Health European genetic samples were imputed on Release 1 of the Human Reference Consortium (HRS r1.1). Non-European samples were imputed using the 1000 Genomes Phase 3 reference panel. Of 606,673 variants, 13,721 were removed with a per-variant missing call rate

filter of 0.02; 245,589 were removed with a Hardy-Weinberg Equilibrium filter of 0.0001, and 609 were removed with a minor allele frequency filter of 0.01, leaving 346,754 SNPs carried through to imputation. Additional details of the quality control are available online (<https://www.cpc.unc.edu/projects/addhealth/documentation/guides>).

*Polygenic Scores (PGS)*. PGS were computed as the linear composite of SNPs associated with ADHD, weighted by each SNPs effect size according to meta-analytic GWAS,<sup>13</sup> which included 55,374 individuals (20,183 cases and 35,191 controls) from 12 studies of mixed ancestries and a replication sample of 93,916 individuals from two mixed ancestry cohorts. This study used an *a priori* GWAS *p*-value threshold of  $p=1$  rather than an empirical *p*-value threshold to minimize potential bias due to overfitting.<sup>34</sup> PGS were then standardized according to genetic ancestry groups in Add Health.<sup>35</sup> Additional controls for the population stratification were done by covarying the first 10 ancestry-specific principal components (PC) of the genetic data in the analyses.<sup>36</sup>

### Statistical Analysis

First, a logistic regression was modeled where ADHD PGS (measured continuously) was regressed on ADHD diagnostic status, controlling for age, biological sex and genetic PCs. A margins test was conducted to compute the expected probability of ADHD at each .5 increments of PGS, from the approximate lowest score to the highest. Then, in the multigroup PGS comparisons, low (<20<sup>th</sup> percentile), medium (21<sup>st</sup> – 70<sup>th</sup> percentiles) and high (>80<sup>th</sup> percentile) PGS groups were defined based on empirical precedents<sup>23</sup> (see eFigure 1). Between PGS group comparisons were conducted in a multivariate analysis of variance (MANOVA), controlling for age, biological sex, and the first 10 principle components of the genetic data. Pairwise contrasts were probed between each PGS group on the dependent variables. Finally, in the gene-

environment interaction models, main effects and the interaction of PGS group and maltreatment exposure were regressed on each functional outcome. The alpha were set to .005 to correct for multiple testing (i.e., 11 dependent variables). Logistic regression was modeled for binary outcomes, negative binomial regressions for zero-inflated positively skewed count outcomes, and linear regression for quantitative outcomes. Bivariate correlations between PGS and ADHD, as well as all other dependent variables are in eTable 2.

## Results

### *PGS and ADHD Diagnostic Status*

PGS was positively associated with ADHD diagnostic status, as expected (OR=1.24, 95% CI=1.14-1.35). Figure 1 (and eTable 3) shows the predicted probabilities of ADHD by .50 increments in ADHD PGS, ranging from the approximate lowest end of the PGS distribution (-3.50) to the highest (3.50). Individuals at the mean (PGS=0) had a 8.19% predicted probability of meeting diagnostic criteria for ADHD (*s.e.*=.32%, 95% CI=7.57-8.81%), falling entirely within the observed incidence of ADHD in Add Health (8.3%). However, individuals at the lowest end of the PGS distribution (-3.50) had a 4.1% predicted probability for ADHD (*s.e.*=.60%, 95% CI=2.8-5.3%), a two-fold reduction in risk from the observed incidence of ADHD in Add Health.

### *PGS Groups and Adult Functional Outcomes*

MANOVA was used to compare PGS group differences across cognition, educational attainment, mental health and behavior, and physical health outcomes (Table 1 and Figure 2). Compared to individuals in the high PGS group (>80<sup>th</sup> percentile), individuals in the low PGS group (<20<sup>th</sup> percentile) had higher standardized scores on the AHPVT, greater educational attainment, less depression symptoms, less likelihood of illicit drug abuse or dependence, less likelihood of being ever arrested, less perceived stress, and lower BMI (Table 2). Unexpectedly,

individuals in the low PGS group had a greater likelihood of alcohol abuse or dependence relative to individuals in the high PGS group (mean difference=.26, *s.e.*=.04,  $p<.01$ , 95% CI=.18-.35). No significant group differences emerged for stage 2 hypertension and high blood cholesterol.

Individuals in the low PGS group were also superior across multiple functional outcomes relative to individuals in the medium PGS group (21<sup>st</sup>-79<sup>th</sup> percentile). Low PGS individuals had higher standardized scores on the AHPVT, greater educational attainment, less depression symptoms, less likelihood of being ever arrested, less perceived stress, lower BMI, and less likelihood of stage 2 hypertension (Table 2). Individuals with low PGS also had a greater likelihood of alcohol abuse or dependence than individuals in the high PGS group (mean difference=.15, *s.e.*=.04,  $p<.01$ , 95% CI=.06-.23). No significant differences between groups emerged with respect to the likelihood of illicit drug abuse or dependence and high blood cholesterol.

#### *PGS Groups by Maltreatment on ADHD and Adult Functional Outcomes*

Multiple regressions were conducted to test the interactive effect of PGS group and childhood maltreatment on ADHD diagnostic status and each of the functional outcomes (eTables 4-6). None of the interactions for PGS and maltreatment were statistically significant after Bonferroni correction ( $p<.005$ ) for the dependent variables tested. PGS was significantly, albeit weakly correlated with childhood maltreatment ( $r=.03$ ,  $p=.02$ ). The results were entirely consistent when standardized residuals of the regression of PGS group on childhood maltreatment were used in the gene-environment interaction models instead (available upon request).

## Discussion

These findings may spur a crucial shift in perspective with regard to the predictive utility of psychiatric PGS, which appears to capture more than just the risk and the absence of risk for a psychiatric outcome. In the case of ADHD PGS, the findings show that where one lies along the distribution may predict diverging functional consequences, for better and for worse. Whereas the majority individuals reside within approximately one standard deviation of the PGS mean, there are also a subset of individuals below this threshold who exhibited a reduction in ADHD risk and superior functional outcomes relative to everyone else in the population. This calls into question whether it is apt characterize low PGS individuals as having “low genetic risk.”<sup>23</sup> For instance, recent GWAS show the rising risk profiles for individuals across the PGS distribution for ADHD<sup>13</sup> and MDD,<sup>37</sup> but only relative to those at the lowest PGS percentile. The current findings suggest that prior comparisons of risk profiles by PGS percentile may have been exaggerated because those at the lowest PGS percentiles may be more reflective of “super controls” rather than typical non-clinical controls at the population level.<sup>20</sup> In fact, most individuals in the population have a modest burden of genetic liability for ADHD, which is consistent with dimensional characterizations of externalizing psychopathology more broadly.<sup>38</sup> Future genetic association studies may wish to identify the point along the PGS distribution that best maps on to the prevalence rate of the outcome in question, which should serve as a more useful reference point when examining the relative risk of a given PGS.

Notably, ADHD PGS was inversely associated with alcohol abuse or dependence. Evidence of shared genetic influences between ADHD and alcohol use disorder is mixed, including two studies showing no association between ADHD PGS and adult problematic alcohol use<sup>39</sup> and dependence<sup>40</sup> and other studies showing a robust positive association.<sup>41,42</sup> Experts have speculated that having low genetic liability for one psychiatric disorder may confer

a greater liability for another, perhaps as an evolutionary trade-off against the costs and benefits of being at the extreme end of the PGS distribution.<sup>20</sup> Future studies can explicitly test this hypothesis by examining PGS associations across a wider range psychopathology, including the externalizing and internalizing continuum.<sup>38</sup>

Another key finding is that while low ADHD PGS conferred a protective effect on ADHD and functional outcomes in adulthood, having a low burden of genetic liability for ADHD did not increase one's protection from the detrimental effects of childhood maltreatment. Notably, this study only focused on the interactive effects between ADHD PGS and childhood maltreatment because of its well-known negative effects on functional outcomes in later life.<sup>25</sup> Other environmental factors may be important to examine in the context of gene-environment interplay as well, especially considering that both environmental adversity and enrichment may differentially moderate genetic associations on these outcomes (i.e., "differential susceptibility" hypothesis).<sup>43</sup> One model that has yet to be tested is whether individuals at the low end of the PGS distribution might potentially profit more from environmental enrichment than those at the higher end of the distribution.

The findings should be interpreted in light of some study limitations. First, racial-ethnic differences with regard to the functional outcomes related to PGS could not be entirely ruled out. This limitation is somewhat alleviated by the several methods that were employed to safeguard against the effects of population stratification (i.e., PGS that were standardized by genetic ancestry, PCs covaried in each of the analyses). Second, ADHD PGS effect sizes as they pertained to ADHD and functional outcomes were uniformly small. However, effect sizes are directly linked to the size of the GWAS discovery sample, which will continue to grow.<sup>44</sup> Finally, this investigation did not assess other disorders that are known to covary with ADHD.

More complex phenotypic models that account of the shared genetic underpinnings of co-occurring phenotypes are needed in future studies.

PGS may soon play a role in clinical contexts.<sup>22,28</sup> It is possible that individuals at high genetic risk may benefit more from an intervention relative to those at moderate and even low genetic risk.<sup>45,46</sup> At the same time, it may be useful to consider PGS as part of a broad constellation of both risk and protective factors when determining treatment recommendations for ADHD and other psychiatric disorders. Uncertainty in clinical decision making can be reduced with a comprehensive view of patient care that aggregates our increasing knowledge of polygenic liability along with crucial clinical information (i.e., biomarkers, environmental factors) pertinent to the individual.



## References

1. Thomas R, Sanders S, Doust J, Beller E, Glasziou P. Prevalence of Attention-Deficit/Hyperactivity Disorder: A Systematic Review and Meta-analysis. *Pediatrics*. 2015;135(4):e994-e1001. doi:10.1542/peds.2014-3482
2. Boonstra AM, Oosterlaan J, Sergeant JA, Buitelaar JK. Executive functioning in adult ADHD: a meta-analytic review. *Psychological Medicine*. 2005;35(8):1097-1108. doi:10.1017/S003329170500499X
3. Kuriyan AB, Pelham WE, Molina BSG, et al. Young Adult Educational and Vocational Outcomes of Children Diagnosed with ADHD. *J Abnorm Child Psychol*. 2013;41(1):27-41. doi:10.1007/s10802-012-9658-z
4. Agnew-Blais JC, Polanczyk GV, Danese A, Wertz J, Moffitt TE, Arseneault L. Young adult mental health and functional outcomes among individuals with remitted, persistent and late-onset ADHD. *The British Journal of Psychiatry*. 2018;213(3):526-534. doi:10.1192/bjp.2018.97
5. Lee SS, Humphreys KL, Flory K, Liu R, Glass K. Prospective association of childhood attention-deficit/hyperactivity disorder (ADHD) and substance use and abuse/dependence: A meta-analytic review. *Clin Psychol Rev*. 2011;31(3):328-341. doi:10.1016/j.cpr.2011.01.006
6. Fletcher J, Wolfe B. Long-term Consequences of Childhood ADHD on Criminal Activities. *J Ment Health Policy Econ*. 2009;12(3):119-138.
7. Combs MA, Canu WH, Broman-Fulks JJ, Rocheleau CA, Nieman DC. Perceived Stress and ADHD Symptoms in Adults. *J Atten Disord*. 2015;19(5):425-434. doi:10.1177/1087054712459558
8. Brook JS, Brook DW, Zhang C, Seltzer N, Finch SJ. Adolescent ADHD and Adult Physical and Mental Health, Work Performance, and Financial Stress. *Pediatrics*. 2013;131(1):5-13. doi:10.1542/peds.2012-1725
9. Demontis D, Walters RK, Martin J, et al. Discovery of the first genome-wide significant risk loci for ADHD. June 2017. doi:10.1101/145581
10. Franke B, Neale BM, Faraone SV. Genome-wide association studies in ADHD. *Hum Genet*. 2009;126(1):13-50. doi:10.1007/s00439-009-0663-4
11. Larsson H, Chang Z, D'Onofrio BM, Lichtenstein P. The heritability of clinically diagnosed attention deficit hyperactivity disorder across the lifespan. *Psychological Medicine*. 2014;44(10):2223-2229. doi:10.1017/S0033291713002493
12. Zayats T, Athanasiu L, Sonderby I, et al. Genome-Wide Analysis of Attention Deficit Hyperactivity Disorder in Norway. *PLOS ONE*. 2015;10(4):e0122501. doi:10.1371/journal.pone.0122501

13. Demontis D, Walters RK, Martin J, et al. Discovery of the first genome-wide significant risk loci for attention deficit/hyperactivity disorder. *Nature Genetics*. 2019;51(1):63. doi:10.1038/s41588-018-0269-7
14. Dudbridge F. Power and predictive accuracy of polygenic risk scores. *PLOS Genetics*. 2013;9(3):e1003348. doi:10.1371/journal.pgen.1003348
15. Groen-Blokhuis MM, Middeldorp CM, Kan K-J, et al. Attention-Deficit/Hyperactivity Disorder Polygenic Risk Scores Predict Attention Problems in a Population-Based Sample of Children. *Journal of the American Academy of Child & Adolescent Psychiatry*. 2014;53(10):1123-1129.e6. doi:10.1016/j.jaac.2014.06.014
16. Hamshere ML, Langley K, Martin J, et al. High Loading of Polygenic Risk for ADHD in Children With Comorbid Aggression. *AJP*. 2013;170(8):909-916. doi:10.1176/appi.ajp.2013.12081129
17. Du Rietz E, Coleman J, Glanville K, Choi SW, O'Reilly PF, Kuntsi J. Association of Polygenic Risk for Attention-Deficit/Hyperactivity Disorder With Co-occurring Traits and Disorders. *Biological Psychiatry: Cognitive Neuroscience and Neuroimaging*. December 2017. doi:10.1016/j.bpsc.2017.11.013
18. Riglin L, Collishaw S, Thapar AK, et al. Association of Genetic Risk Variants With Attention-Deficit/Hyperactivity Disorder Trajectories in the General Population. *JAMA Psychiatry*. 2016;73(12):1285-1292. doi:10.1001/jamapsychiatry.2016.2817
19. Stergiakouli E, Martin J, Hamshere ML, et al. Shared Genetic Influences Between Attention-Deficit/Hyperactivity Disorder (ADHD) Traits in Children and Clinical ADHD. *Journal of the American Academy of Child & Adolescent Psychiatry*. 2015;54(4):322-327. doi:10.1016/j.jaac.2015.01.010
20. Plomin R, Haworth CMA, Davis OSP. Common disorders are quantitative traits. *Nature Reviews Genetics*. 2009;10(12):872-878. doi:10.1038/nrg2670
21. Krapohl E, Euesden J, Zabaneh D, et al. Phenome-wide analysis of genome-wide polygenic scores. *Molecular Psychiatry*. 2016;21(9):1188-1193. doi:10.1038/mp.2015.126
22. Anderson JS, Shade J, DiBlasi E, Shabalin AA, Docherty AR. Polygenic risk scoring and prediction of mental health outcomes. *Current Opinion in Psychology*. 2019;27:77-81. doi:10.1016/j.copsy.2018.09.002
23. Torkamani A, Wineinger NE, Topol EJ. The personal and clinical utility of polygenic risk scores. *Nature Reviews Genetics*. 2018;19(9):581. doi:10.1038/s41576-018-0018-x
24. Khera AV, Chaffin M, Aragam KG, et al. Genome-wide polygenic scores for common diseases identify individuals with risk equivalent to monogenic mutations. *Nature Genetics*. 2018;50(9):1219. doi:10.1038/s41588-018-0183-z

25. Wegman HL, Stetler C. A meta-analytic review of the effects of childhood abuse on medical outcomes in adulthood. *Psychosom Med.* 2009;71(8):805-812. doi:10.1097/PSY.0b013e3181bb2b46
26. Peyrot WJ, Milaneschi Y, Abdellaoui A, et al. Effect of polygenic risk scores on depression in childhood trauma. *The British Journal of Psychiatry.* 2014;205(2):113-119. doi:10.1192/bjp.bp.113.143081
27. Mullins N, Power RA, Fisher HL, et al. Polygenic interactions with environmental adversity in the aetiology of major depressive disorder. *Psychological Medicine.* 2016;46(4):759-770. doi:10.1017/S0033291715002172
28. Bogdan R, Baranger DAA, Agrawal A. Polygenic Risk Scores in Clinical Psychology: Bridging Genomic Risk to Individual Differences. *Annual Review of Clinical Psychology.* 2018;14(1):119-157. doi:10.1146/annurev-clinpsy-050817-084847
29. American Psychiatric Association. *Diagnostic and Statistical Manual of Mental Disorders.* 5th ed. Washington, D.C.: Author; 2013.
30. Radloff LS. The CES-D Scale: A Self-Report Depression Scale for Research in the General Population. *Applied Psychological Measurement.* 1977;1(3):385-401. doi:10.1177/014662167700100306
31. Cohen S, Kamarck T, Mermelstein R. A Global Measure of Perceived Stress. *Journal of Health and Social Behavior.* 1983;24(4):385-396. doi:10.2307/2136404
32. Haberstick BC, Lessem JM, Hopfer CJ, et al. Monoamine oxidase A (MAOA) and antisocial behaviors in the presence of childhood and adolescent maltreatment. *American Journal of Medical Genetics Part B: Neuropsychiatric Genetics.* 2005;135B(1):59-64. doi:10.1002/ajmg.b.30176
33. Li JJ, Lee SS. Latent Class Analysis of Antisocial Behavior: Interaction of Serotonin Transporter Genotype and Maltreatment. *J Abnorm Child Psychol.* 2010;38(6):789-801. doi:10.1007/s10802-010-9409-y
34. Benjamini Y, Drai D, Elmer G, Kafkafi N, Golani I. Controlling the false discovery rate in behavior genetics research. *Behavioural Brain Research.* 2001;125(1):279-284. doi:10.1016/S0166-4328(01)00297-2
35. Braudt D, Harris K. Polygenic Scores (PGSs) in the National Longitudinal Study of Adolescent to Adult Health (Add Health) – Release 1. *Carolina Digital Repository.* 2018. doi:10.17615/c6m372
36. Price AL, Patterson NJ, Plenge RM, Weinblatt ME, Shadick NA, Reich D. Principal components analysis corrects for stratification in genome-wide association studies. *Nature Genetics.* 2006;38(8):904-909. doi:10.1038/ng1847

37. Wray NR, Ripke S, Mattheisen M, et al. Genome-wide association analyses identify 44 risk variants and refine the genetic architecture of major depression. *Nature Genetics*. 2018;50(5):668. doi:10.1038/s41588-018-0090-3
38. Krueger RF, Markon KE, Patrick CJ, Iacono WG. Externalizing Psychopathology in Adulthood: A Dimensional-Spectrum Conceptualization and Its Implications for DSM–V. *J Abnorm Psychol*. 2005;114(4):537-550. doi:10.1037/0021-843X.114.4.537
39. Carey CE, Knodt AR, Conley ED, Hariri AR, Bogdan R. Reward-Related Ventral Striatum Activity Links Polygenic Risk for Attention-Deficit/Hyperactivity Disorder to Problematic Alcohol Use in Young Adulthood. *Biological Psychiatry: Cognitive Neuroscience and Neuroimaging*. 2017;2(2):180-187. doi:10.1016/j.bpsc.2016.10.003
40. Carey CE, Agrawal A, Bucholz KK, et al. Associations between Polygenic Risk for Psychiatric Disorders and Substance Involvement. *Front Genet*. 2016;7. doi:10.3389/fgene.2016.00149
41. Capusan AJ, Bendtsen P, Marteinsdottir I, Kuja-Halkola R, Larsson H. Genetic and environmental contributions to the association between attention deficit hyperactivity disorder and alcohol dependence in adulthood: A large population-based twin study. *American Journal of Medical Genetics Part B: Neuropsychiatric Genetics*. 2015;168(6):414-422. doi:10.1002/ajmg.b.32300
42. Derks EM, Vink JM, Willemsen G, Brink W van den, Boomsma DI. Genetic and environmental influences on the relationship between adult ADHD symptoms and self-reported problem drinking in 6024 Dutch twins. *Psychological Medicine*. 2014;44(12):2673-2683. doi:10.1017/S0033291714000361
43. Belsky J, Pluess M. Beyond diathesis stress: Differential susceptibility to environmental influences. *Psychological Bulletin*. 2009;135(6):885-908. doi:10.1037/a0017376
44. Wood AR, Esko T, Yang J, et al. Defining the role of common variation in the genomic and biological architecture of adult human height. *Nature Genetics*. 2014;46(11):1173-1186. doi:10.1038/ng.3097
45. Natarajan Pradeep, Young Robin, Stitzel Nathan O., et al. Polygenic Risk Score Identifies Subgroup With Higher Burden of Atherosclerosis and Greater Relative Benefit From Statin Therapy in the Primary Prevention Setting. *Circulation*. 2017;135(22):2091-2101. doi:10.1161/CIRCULATIONAHA.116.024436
46. Mega JL, Stitzel NO, Smith JG, et al. Genetic risk, coronary heart disease events, and the clinical benefit of statin therapy: an analysis of primary and secondary prevention trials. *The Lancet*. 2015;385(9984):2264-2271. doi:10.1016/S0140-6736(14)61730-X

Table 1. Multivariate analysis of variance (MANOVA) comparing PGS status across functional outcomes (continued on next page)

| Dependent Variable                   | PGS Status | Mean   | s.e. | Between Subjects Effects |      |    | 95% Confidence Interval |        | Partial Eta <sup>2</sup> |
|--------------------------------------|------------|--------|------|--------------------------|------|----|-------------------------|--------|--------------------------|
|                                      |            |        |      | F                        | p    | df | Lower                   | Upper  |                          |
| Cognition                            |            |        |      |                          |      |    |                         |        |                          |
| AHPVT standardized score             | Low        | 104.07 | .37  | 10.20                    | <.01 | 14 | 103.34                  | 104.79 | .02                      |
|                                      | Medium     | 101.39 | .22  |                          |      |    | 100.96                  | 101.81 |                          |
|                                      | High       | 99.26  | .38  |                          |      |    | 98.52                   | 100.00 |                          |
| Educational Attainment               |            |        |      |                          |      |    |                         |        |                          |
| Highest degree attained              | Low        | 5.91   | .05  | 20.90                    | <.01 | 14 | 5.80                    | 6.01   | .04                      |
|                                      | Medium     | 5.53   | .03  |                          |      |    | 5.47                    | 5.59   |                          |
|                                      | High       | 5.09   | .06  |                          |      |    | 4.98                    | 5.20   |                          |
| Mental Health and Behavior           |            |        |      |                          |      |    |                         |        |                          |
| CES-D depression symptoms            | Low        | 6.07   | .12  | 10.02                    | <.01 | 14 | 5.83                    | 6.31   | .02                      |
|                                      | Medium     | 6.72   | .07  |                          |      |    | 6.58                    | 6.86   |                          |
|                                      | High       | 7.01   | .13  |                          |      |    | 6.77                    | 7.26   |                          |
| DSM-IV alcohol abuse/dependence      | Low        | .32    | .01  | 10.19                    | <.01 |    | .30                     | .34    | .02                      |
|                                      | Medium     | .29    | .01  |                          |      |    | .28                     | .30    |                          |
|                                      | High       | .25    | .01  |                          |      |    | .22                     | .27    |                          |
| DSM-IV illicit drug abuse/dependence | Low        | .08    | .01  | 2.07                     | .01  | 14 | .06                     | .09    | .00                      |
|                                      | Medium     | .08    | .00  |                          |      |    | .07                     | .09    |                          |
|                                      | High       | .10    | .01  |                          |      |    | .09                     | .12    |                          |
| Ever arrested                        | Low        | .26    | .01  | 43.34                    | <.01 | 14 | .23                     | .28    | .08                      |
|                                      | Medium     | .29    | .01  |                          |      |    | .28                     | .31    |                          |
|                                      | High       | .35    | .01  |                          |      |    | .32                     | .37    |                          |
| Perceived Stress                     | Low        | 4.51   | .08  | 7.84                     | <.01 | 14 | 4.35                    | 4.66   | .02                      |
|                                      | Medium     | 4.85   | .05  |                          |      |    | 4.75                    | 4.94   |                          |
|                                      | High       | 5.05   | .08  |                          |      |    | 4.89                    | 5.21   |                          |

Table 1. Multivariate analysis of variance (MANOVA) comparing PGS status across functional outcomes (Continued)

| Dependent Variable     | PGS Status | Mean | s.e. | Between Subjects Effects |      |    | 95% Confidence Interval |       | Partial Eta <sup>2</sup> |
|------------------------|------------|------|------|--------------------------|------|----|-------------------------|-------|--------------------------|
|                        |            |      |      | F                        | p    | df | Lower                   | Upper |                          |
| Physical Health        |            |      |      |                          |      |    |                         |       |                          |
| BMI                    | Low        | 3.12 | .04  | 5.18                     | <.01 | 14 | 3.05                    | 3.19  | .01                      |
|                        | Medium     | 3.34 | .02  |                          |      |    | 3.30                    | 3.38  |                          |
|                        | High       | 3.44 | .04  |                          |      |    | 3.37                    | 3.51  |                          |
| Hypertension stage 2   |            |      |      |                          |      |    |                         |       |                          |
|                        | Low        | .11  | .01  | 4.67                     | <.01 | 14 | .10                     | .13   | .01                      |
|                        | Medium     | .14  | .01  |                          |      |    | .13                     | .15   |                          |
|                        | High       | .14  | .01  |                          |      |    | .13                     | .16   |                          |
| High blood cholesterol |            |      |      |                          |      |    |                         |       |                          |
|                        | Low        | .08  | .01  | 3.70                     | <.01 | 14 | .07                     | .10   | .01                      |
|                        | Medium     | .07  | .00  |                          |      |    | .06                     | .08   |                          |
|                        | High       | .09  | .01  |                          |      |    | .08                     | .11   |                          |

Caption. Results show a multivariate analysis of variance controlling for age, biological sex, and the first 10 principle components of the genetic information (i.e., genetic ancestry). “Low” PGS is the lowest quintile (<20<sup>th</sup> percentile) of the PGS distribution, “Medium” PGS is the combination of the second, third, and fourth quintiles (21<sup>st</sup> – 79<sup>th</sup> percentile) of the PGS distribution, “High” PGS is the fifth quintile (>80<sup>th</sup> percentile) of the PGS distribution.

Table 2. Pairwise contrasts of PGS groups on dependent variables (continued on next page)

| PGS Group Contrasts    | Dependent Variable                   | Mean Difference | s.e. | p    | 95% Confidence Interval |       |
|------------------------|--------------------------------------|-----------------|------|------|-------------------------|-------|
|                        |                                      |                 |      |      | Lower                   | Upper |
| Low versus Medium      | Cognition                            |                 |      |      |                         |       |
|                        | AHPVT standardized score             | 2.68            | .43  | <.01 | 1.84                    | 3.53  |
|                        | Educational Attainment               |                 |      |      |                         |       |
|                        | Highest degree attained              | .38             | .06  | <.01 | .26                     | .82   |
|                        | Mental Health and Behavior           |                 |      |      |                         |       |
|                        | CES-D depression symptoms            | -.67            | .14  | <.01 | -.95                    | -.39  |
|                        | DSM-IV alcohol abuse/dependence      | .03             | .01  | .03  | 0                       | .06   |
|                        | DSM-IV illicit drug abuse/dependence | .00             | .01  | .86  | -.02                    | .02   |
|                        | Ever arrested                        | -.04            | .01  | .01  | -.01                    | -.06  |
|                        | Perceived stress                     | -.34            | .09  | <.01 | -.52                    | -.16  |
|                        | Physical Health                      |                 |      |      |                         |       |
|                        | BMI                                  | -.22            | .04  | <.01 | -.30                    | -.14  |
|                        | Hypertension stage 2                 | -.02            | .01  | .02  | -.05                    | 0     |
| High blood cholesterol | .01                                  | .01             | .23  | -.01 | .03                     |       |
| Low versus High        | Cognition                            |                 |      |      |                         |       |
|                        | AHPVT standardized score             | 4.80            | .53  | <.01 | 3.75                    | 5.84  |
|                        | Educational Attainment               |                 |      |      |                         |       |
|                        | Highest degree attained              | .82             | .08  | <.01 | .67                     | .97   |
|                        | Mental Health and Behavior           |                 |      |      |                         |       |
|                        | CES-D depression symptoms            | -.92            | .18  | <.01 | -1.27                   | -.58  |
|                        | DSM-IV alcohol abuse/dependence      | .07             | .02  | <.01 | .04                     | .11   |
|                        | DSM-IV illicit drug abuse/dependence | -.02            | .01  | .04  | -.43                    | 0     |
| Ever arrested          | -.09                                 | .02             | <.01 | -.12 | -.06                    |       |
| Perceived stress       | -.55                                 | .12             | <.01 | -.77 | .32                     |       |



Table 2. Pairwise contrasts of PGS groups on dependent variables (continued from previous page)

| PGS Group Contrasts    | Dependent Variable                   | Mean difference | s.e. | p    | 95% Confidence Interval |       |
|------------------------|--------------------------------------|-----------------|------|------|-------------------------|-------|
|                        |                                      |                 |      |      | Lower                   | Upper |
| Low versus High        | Physical Health                      |                 |      |      |                         |       |
|                        | BMI                                  | -.32            | .05  | .00  | -.42                    | -.22  |
|                        | Hypertension stage 2                 | -.03            | .01  | .06  | -.05                    | .00   |
|                        | High blood cholesterol               | -.01            | .01  | .39  | -.03                    | .01   |
| Medium versus High     | Cognition                            |                 |      |      |                         |       |
|                        | AHPVT standardized score             | 2.12            | .44  | .00  | 1.26                    | 2.97  |
|                        | Educational Attainment               |                 |      |      |                         |       |
|                        | Highest degree attained              | .44             | .06  | .00  | .32                     | .56   |
|                        | Mental Health and Behavior           |                 |      |      |                         |       |
|                        | CES-D depression symptoms            | -.25            | .14  | .08  | -.54                    | .03   |
|                        | DSM-IV alcohol abuse/dependence      | .04             | .01  | .00  | .01                     | .07   |
|                        | DSM-IV illicit drug abuse/dependence | -.02            | .01  | .02  | -.04                    | .00   |
|                        | Ever arrested                        | -.05            | .01  | .00  | -.08                    | -.03  |
|                        | Perceived stress                     | -.21            | .09  | .03  | -.39                    | -.02  |
|                        | Physical Health                      |                 |      |      |                         |       |
| BMI                    | -.10                                 | .04             | .01  | -.18 | -.02                    |       |
| Hypertension stage 2   | .00                                  | .01             | .91  | -.02 | .02                     |       |
| High blood cholesterol | -.02                                 | .01             | .03  | -.04 | .00                     |       |



Figure 1. Predicted probabilities of meeting diagnostic criteria for ADHD in Add Health by ADHD PGS

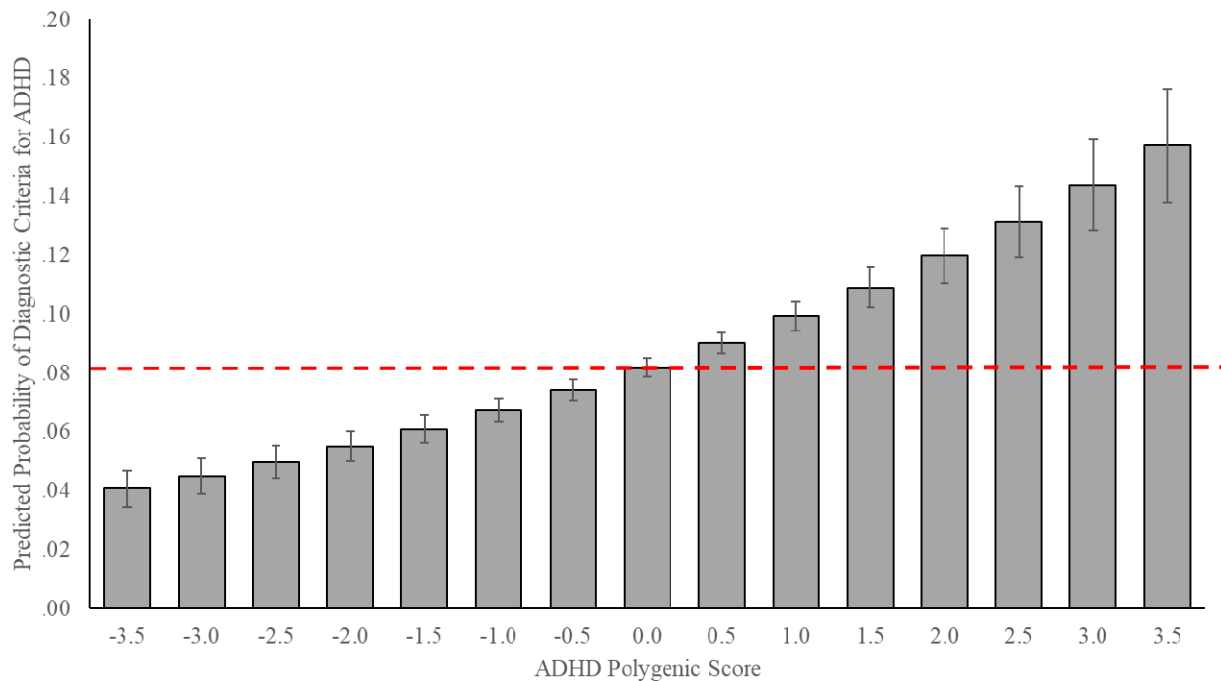

*Caption.* Figure shows the predicted probabilities of meeting diagnostic criteria for ADHD in Add Health by .5 increments of ADHD PGS, according to a binary logistic regression that controlled for age, biological sex, and the first 10 principle components of the genetic information (i.e., genetic ancestry). Dotted red line shows the Add Health prevalence rate of ADHD (8.3%). For example, individuals at -3.5 PGS have a 4.1% predicted probability of meeting diagnostic criteria for ADHD, which represents a two-fold reduction in risk of ADHD relative to the Add Health prevalence rate. In contrast, individuals at 3.5 PGS have a 15.7% predicted probability of meeting criteria for ADHD, which is a nearly two-fold increase in risk over the general prevalence rate. Error bars reflect standard errors.

Figure 2. Associations between ADHD PGS levels and functional outcomes.

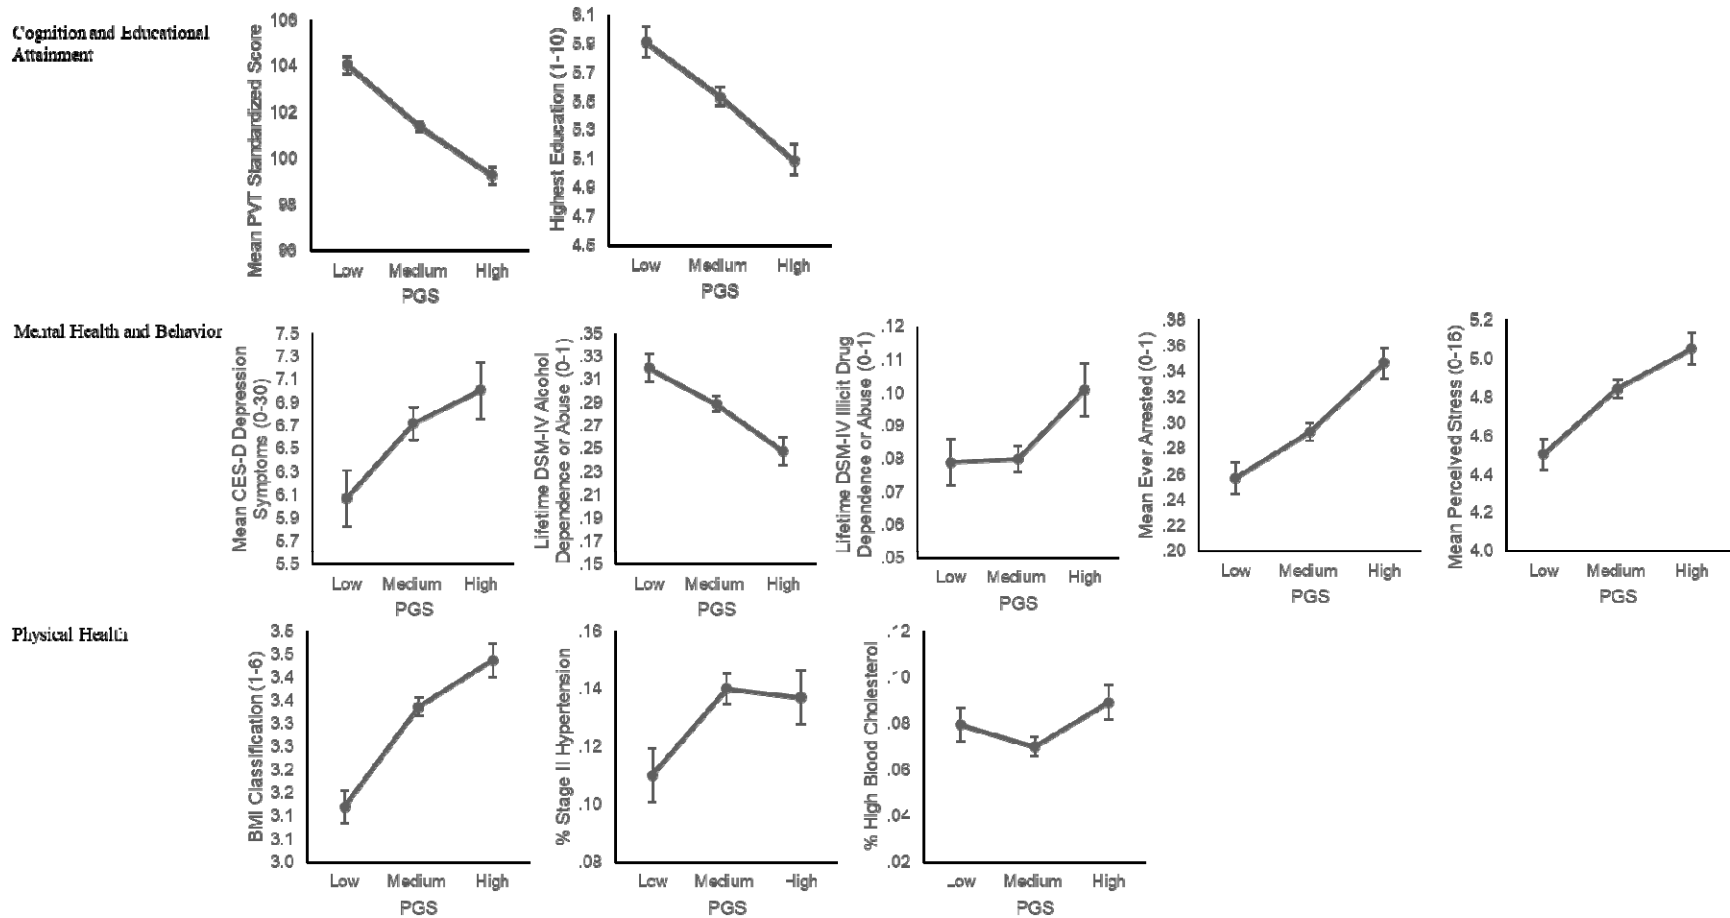

*Caption.* Plots of the predicted means for each dependent variable by each ADHD PGS level, obtained from a multivariate analysis of variance controlling for age, biological sex, and the first 10 principle components of the genetic information (i.e., genetic ancestry). “Low” PGS is the lowest quintile (<20<sup>th</sup> percentile) of the ADHD PGS distribution, “Medium” PGS is the combination of the second, third, and fourth quintiles (21<sup>st</sup> – 79<sup>th</sup> percentile) of the ADHD PGS distribution, “High” PGS is the fifth quintile (>80<sup>th</sup> percentile) of the ADHD PGS distribution. Standard errors are shown on each figure.
